# Supplementary material
Source: PubMed Central journal article supplement (PMC7371499)
Supplement: NIHMS1067599-supplement-Supp_TableS1-6.pdf [file NIHMS1067599-supplement-Supp_TableS1-6.pdf]

## **Elevated anti-citrullinated protein antibodies prior to rheumatoid arthritis diagnosis and risks for chronic obstructive pulmonary disease or asthma**

Alessandra Zaccardelli, BS<sup>1</sup>  
Xinyi Liu, MS<sup>1</sup>  
Julia A. Ford, MD<sup>1,2</sup>  
Jing Cui, MD, PhD<sup>1,2</sup>  
Bing Lu, MD, DrPH<sup>1,2</sup>  
Su H. Chu, PhD, MS<sup>1,2</sup>  
Peter H. Schur, MD<sup>1,2</sup>  
Cameron B. Speyer, BA<sup>1</sup>  
Karen H. Costenbader, MD, MPH<sup>1,2</sup>  
William H. Robinson, MD, PhD<sup>3,4</sup>  
Jeremy Sokolove, MD<sup>3,4,5</sup>  
Elizabeth W. Karlson, MD, MS<sup>1,2</sup>  
Carlos A. Camargo, Jr., MD, DrPH<sup>1,2,6</sup>  
Jeffrey A. Sparks, MD, MMSc<sup>1,2</sup>

<sup>1</sup>Brigham and Women's Hospital, Boston, MA, USA

<sup>2</sup>Harvard Medical School, Boston, MA, USA

<sup>3</sup>Stanford University School of Medicine, Palo Alto, CA, USA

<sup>4</sup>VA Palo Alto Health Care System, Palo Alto, CA, USA

<sup>5</sup>GlaxoSmithKline

<sup>6</sup>Massachusetts General Hospital, Boston, MA, USA

### **Supplemental Material**

**S1. Supplemental Table 1.** Contingency table comparing results from the research ACPA and CCP2 assays among the pre-RA women who had both tests performed in blood banked prior to clinical RA diagnosis (n=167).

**S2. Supplemental Table 2.** Hazard ratios for incident COPD after blood draw date by pre-RA ACPA serostatus in the Nurses' Health Studies (n=283).

**S3. Supplemental Table 3.** Hazard ratios for incident asthma after blood draw date by pre-RA ACPA serostatus in the Nurses' Health Studies (n=252).

**S4. Supplemental Table 4.** Hazard ratios for incident COPD after blood draw date, comparing women who developed RA to their matched controls in the Nurses' Health Studies, among ever smokers (n=557).

**S5. Supplemental Table 5.** Hazard ratios for incident asthma after blood draw date, comparing women who developed RA to their matched controls in the Nurses' Health Studies, among never smokers (n=483).

**S6. Supplemental Table 6.** Hazard ratios for incident asthma after blood draw date, comparing women who developed RA to their matched controls in the Nurses' Health Studies, among ever smokers (n=468).

**Supplemental Table 1.** Contingency table comparing results from the research ACPA and CCP2 assays among the pre-RA women who had both tests performed in blood banked prior to clinical RA diagnosis (n=167).

|                       | <b>CCP2+</b> | <b>CCP2-</b> | <b>TOTAL</b> |
|-----------------------|--------------|--------------|--------------|
| <b>Research ACPA+</b> | 36           | 8            | 44           |
| <b>Research ACPA-</b> | 3            | 120          | 123          |
| <b>TOTAL</b>          | 39           | 128          | 167          |

Kappa statistic=0.82

Concordance=93%

ACPA, anti-citrullinated protein antibody; CCP, 2nd generation cyclic citrullinate peptide.

**Supplemental Table 2.** Hazard ratios for incident COPD after blood draw date by pre-RA ACPA serostatus in the Nurses' Health Studies (n=283).

|                                              | <b>Incident COPD<br/>cases/person-years</b> | <b>Unadjusted HR<br/>(95%CI)</b> | <b>Multivariable**<br/>HR (95%CI)</b> |
|----------------------------------------------|---------------------------------------------|----------------------------------|---------------------------------------|
| Pre-RA ACPA+ (n=59)                          | 13/1,030                                    | 2.22 (1.13, 4.39)                | 2.22 (1.12, 4.41)                     |
| Pre-RA ACPA- (n=224)                         | 23/4,117                                    | 1.00 (Ref)                       | 1.00 (Ref)                            |
| Pre-RA ACPA+ (n=59)                          | 13/1,030                                    | 4.56 (1.03, 21.21)               | 4.03 (0.90, 18.10)                    |
| Pre-RA ACPA- <5 years to<br>diagnosis (n=40) | 2/731                                       | 1.00 (Ref)                       | 1.00 (Ref)                            |

\*\*Adjusted for smoking (continuous pack-years) and body mass index (continuous, kg/m<sup>2</sup>).

ACPA, anti-citrullinated protein antibodies; CI, confidence interval; COPD, chronic obstructive pulmonary disease; HR, hazard ratio; RA, rheumatoid arthritis.

**Supplemental Table 3.** Hazard ratios for incident asthma after blood draw date by pre-RA ACPA serostatus in the Nurses' Health Studies (n=252).

|                                              | <b>Incident COPD<br/>cases/person-years</b> | <b>Unadjusted HR<br/>(95%CI)</b> | <b>Multivariable**<br/>HR (95%CI)</b> |
|----------------------------------------------|---------------------------------------------|----------------------------------|---------------------------------------|
| Pre-RA ACPA+ (n=49)                          | 8/890                                       | 1.08 (0.50, 2.35)                | 1.14 (0.52, 2.49)                     |
| Pre-RA ACPA- (n=203)                         | 31/3,777                                    | 1.00 (Ref)                       | 1.00 (Ref)                            |
| Pre-RA ACPA+ (n=49)                          | 8/890                                       | 2.10 (0.56, 7.93)                | 2.53 (0.66, 9.72)                     |
| Pre-RA ACPA- <5 years to<br>diagnosis (n=36) | 3/682                                       | 1.00 (Ref)                       | 1.00 (Ref)                            |

\*\*Adjusted for smoking (continuous pack-years) and body mass index (continuous, kg/m<sup>2</sup>).

ACPA, anti-citrullinated protein antibodies; CI, confidence interval; COPD, chronic obstructive pulmonary disease; HR, hazard ratio; RA, rheumatoid arthritis.

**Supplemental Table 4.** Hazard ratios for incident COPD after blood draw date, comparing women who developed RA to their matched controls in the Nurses' Health Studies, among ever smokers (n=557).

|                          | <b>Incident COPD cases/person-years</b> | <b>HR (95%CI) controlling for matching factors*</b> | <b>Multivariable** HR (95%CI)</b> |
|--------------------------|-----------------------------------------|-----------------------------------------------------|-----------------------------------|
| Pre-RA ACPA+ (n=35)      | 10/592                                  | 2.51 (1.10, 5.73)                                   | 2.77 (1.11, 6.95)                 |
| Matched controls (n=102) | 13/1,947                                | 1.00 (Ref)                                          | 1.00 (Ref)                        |
| Pre-RA ACPA- (n=119)     | 17/2,172                                | 1.15 (0.65, 2.02)                                   | 1.06 (0.59, 1.90)                 |
| Matched controls (n=301) | 40/5,865                                | 1.00 (Ref)                                          | 1.00 (Ref)                        |
| All pre-RA (n= 154)      | 27/2,764                                | 1.44 (0.91, 2.29)                                   | 1.34 (0.83, 2.14)                 |
| Matched controls (n=403) | 53/7,811                                | 1.00 (Ref)                                          | 1.00 (Ref)                        |

\*Each woman with RA was matched to 3 controls by age, time from blood draw to index date, cohort, calendar year, fasting status/time of day at blood draw, menopausal status, and postmenopausal hormone use.

\*\*Additionally adjusted for body mass index (continuous, kg/m<sup>2</sup>), and median household income (quartile).

ACPA, anti-citrullinated protein antibodies; CI, confidence interval; COPD, chronic obstructive pulmonary disease; HR, hazard ratio; RA, rheumatoid arthritis.

**Supplemental Table 5.** Hazard ratios for incident asthma after blood draw date, comparing women who developed RA to their matched controls in the Nurses' Health Studies, among never smokers (n=483).

|                          | <b>Incident asthma cases/person-years</b> | <b>HR (95%CI) controlling for matching factors*</b> | <b>Multivariable** HR (95%CI)</b> |
|--------------------------|-------------------------------------------|-----------------------------------------------------|-----------------------------------|
| Pre-RA ACPA+ (n=19)      | 1/369                                     | 0.77 (0.09, 6.92)                                   | 0.62 (0.07, 5.69)                 |
| Matched controls (n=56)  | 4/1,110                                   | 1.00 (Ref)                                          | 1.00 (Ref)                        |
| Pre-RA ACPA- (n=97)      | 16/1,806                                  | 2.12 (1.13, 3.97)                                   | 2.18 (1.16, 4.09)                 |
| Matched controls (n=311) | 25/6,041                                  | 1.00 (Ref)                                          | 1.00 (Ref)                        |
| All pre-RA (n=116)       | 17/2,175                                  | 1.92 (1.05, 3.49)                                   | 1.97 (1.08, 3.60)                 |
| Matched controls (n=367) | 29/7,151                                  | 1.00 (Ref)                                          | 1.00 (Ref)                        |

\*Each woman with RA was matched to 3 controls by age, time from blood draw to index date, cohort, calendar year, fasting status/time of day at blood draw, menopausal status, and postmenopausal hormone use.

\*\*Additionally adjusted for body mass index (continuous, kg/m<sup>2</sup>), and median household income (quartile).

ACPA, anti-citrullinated protein antibodies; CI, confidence interval; COPD, chronic obstructive pulmonary disease; HR, hazard ratio; RA, rheumatoid arthritis.

**Supplemental Table 6.** Hazard ratios for incident asthma after blood draw date, comparing women who developed RA to their matched controls in the Nurses' Health Studies, among ever smokers (n=468).

|                          | <b>Incident asthma cases/person-years</b> | <b>HR (95%CI) controlling for matching factors*</b> | <b>Multivariable** HR (95%CI)</b> |
|--------------------------|-------------------------------------------|-----------------------------------------------------|-----------------------------------|
| Pre-RA ACPA+ (n=30)      | 7/521                                     | 2.04 (0.78, 5.37)                                   | 2.21 (0.81, 5.98)                 |
| Matched controls (n=80)  | 10/1,549                                  | 1.00 (Ref)                                          | 1.00 (Ref)                        |
| Pre-RA ACPA- (n=106)     | 15/1,971                                  | 1.40 (0.74, 2.63)                                   | 1.20 (0.62, 2.29)                 |
| Matched controls (n=252) | 27/4,998                                  | 1.00 (Ref)                                          | 1.00 (Ref)                        |
| All pre-RA (n=136)       | 22/2,492                                  | 1.55 (0.91, 2.62)                                   | 1.43 (0.84, 2.44)                 |
| Matched controls (n=332) | 37/6,547                                  | 1.00 (Ref)                                          | 1.00 (Ref)                        |

\*Each woman with RA was matched to 3 controls by age, time from blood draw to index date, cohort, calendar year, fasting status/time of day at blood draw, menopausal status, and postmenopausal hormone use.

\*\*Additionally adjusted for smoking (continuous pack-years), body mass index (continuous, kg/m<sup>2</sup>) and median household income (quartile).

ACPA, anti-citrullinated protein antibodies; CI, confidence interval; COPD, chronic obstructive pulmonary disease; HR, hazard ratio; RA, rheumatoid arthritis.
